# Supplementary material for: mRNA‐based Vaccines Targeting the T‐cell Epitope‐rich Domain of Epstein Barr Virus Latent Proteins Elicit Robust Anti‐Tumor Immunity in Mice
Source: PubMed Central journal article supplement (PMC10724410; doi:10.1002/advs.202302116), 2023-10-27
Supplement: ADVS-10-2302116-s001.pdf [file ADVS-10-2302116-s001.pdf]

## Supporting Information

for *Adv. Sci.*, DOI 10.1002/adv.202302116

mRNA-based Vaccines Targeting the T-cell Epitope-rich Domain of Epstein Barr Virus Latent Proteins Elicit Robust Anti-Tumor Immunity in Mice

*Ge-Xin Zhao, Guo-Long Bu, Gang-Feng Liu, Xiang-Wei Kong, Cong Sun, Zi-Qian Li, Dan-Ling Dai, Hai-Xia Sun, Yin-Feng Kang, Guo-Kai Feng\**, *Qian Zhong\** and *Mu-Sheng Zeng\**

## Supplementary Materials

A

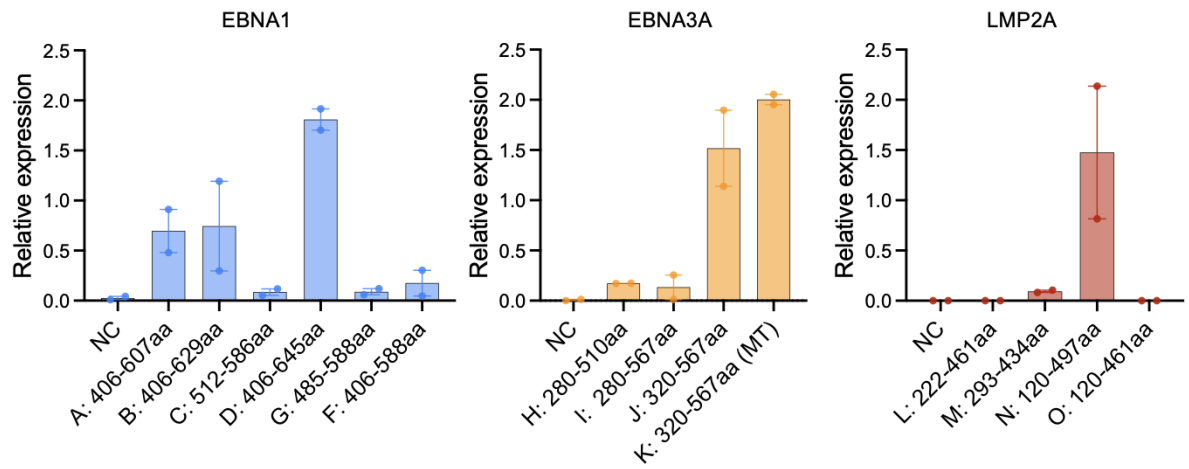

B

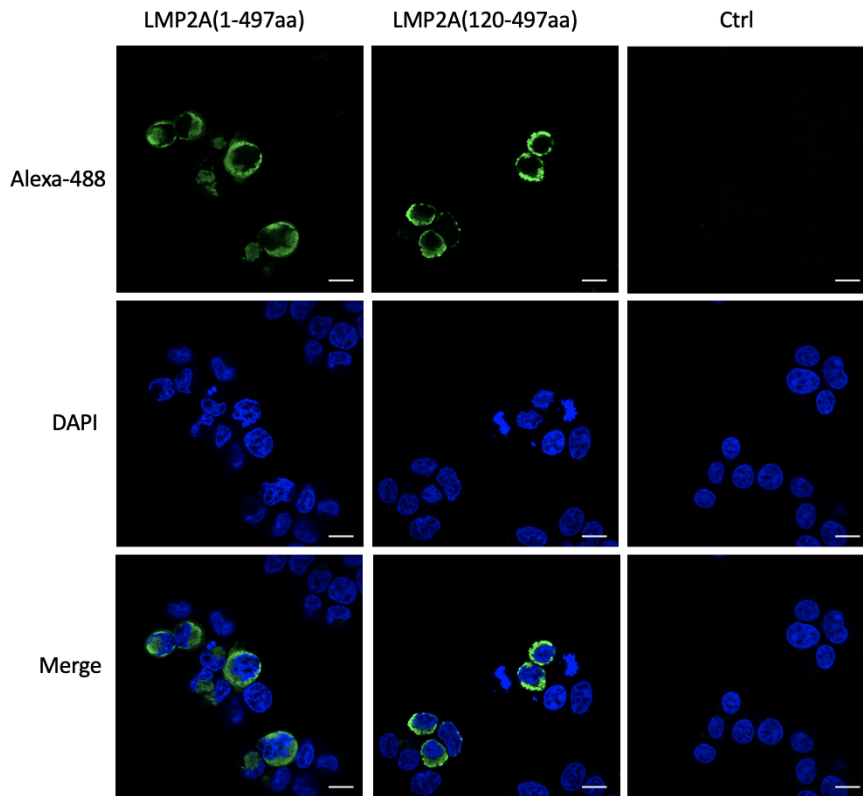

**Fig.S1 Relative truncated protein expression level and expression of Flag-tagged Trunc-LMP2A and FL-LMP2A in 293T cells.**

(A) Quantification of protein expression relative to beta-actin associated with Figure 1B is shown ( $n=2$ ). Error bars, mean  $\pm$  SEM. (B) Representative confocal images of 293T cells expressing flag-tagged Trunc-LMP2A(120-497aa) and FL-LMP2A(1-497aa). The corresponding mRNA was transfected into 293T cells 12 h before detection. Protein

expression was detected with Alexa Fluor® 488 conjugated anti-flag antibody(green), and the nuclei were stained with DAPI (blue). Scale Bar = 10  $\mu$ m.

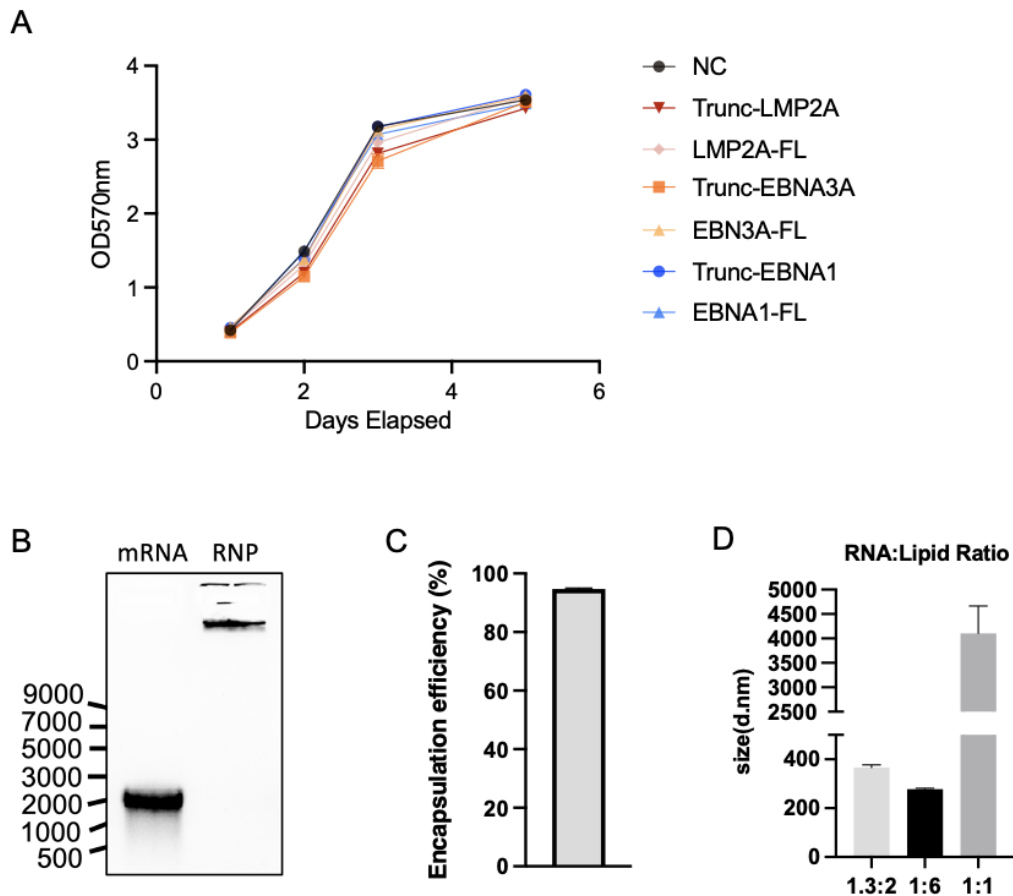

**Fig.S2 Cell proliferation assay and characterization of mRNA-liposome nanoparticle complex.**

(A) Cells (4T1) were seeded in 96-well plates, transfected with different antigens or an empty vector (NC) 24 h after seeding, and analyzed using the MTT cell proliferation assay. No significant difference was observed among the groups (n=6). (B) Trunc-LMP2A mRNA (2  $\mu$ g) and mRNA complexed with liposome (Trunc-LMP2A RNP) (2  $\mu$ g) were loaded on a TAE gel and ran for 20 min. (C) The RNP was concentrated for 60 min at 16260rcf (12,000 rpm), and the RNA concentration of the supernatant was determined. Encapsulation efficiency was calculated as the ratio of the RNA concentration in the supernatant to the total RNA concentration before liposome packaging (n=3). (D) The particle size of RNP was determined for different molar ratios of RNA and the cationic lipid, with a ratio of 1.3:2 being used consistently throughout the study (n=4). Error bars, mean  $\pm$  SEM.

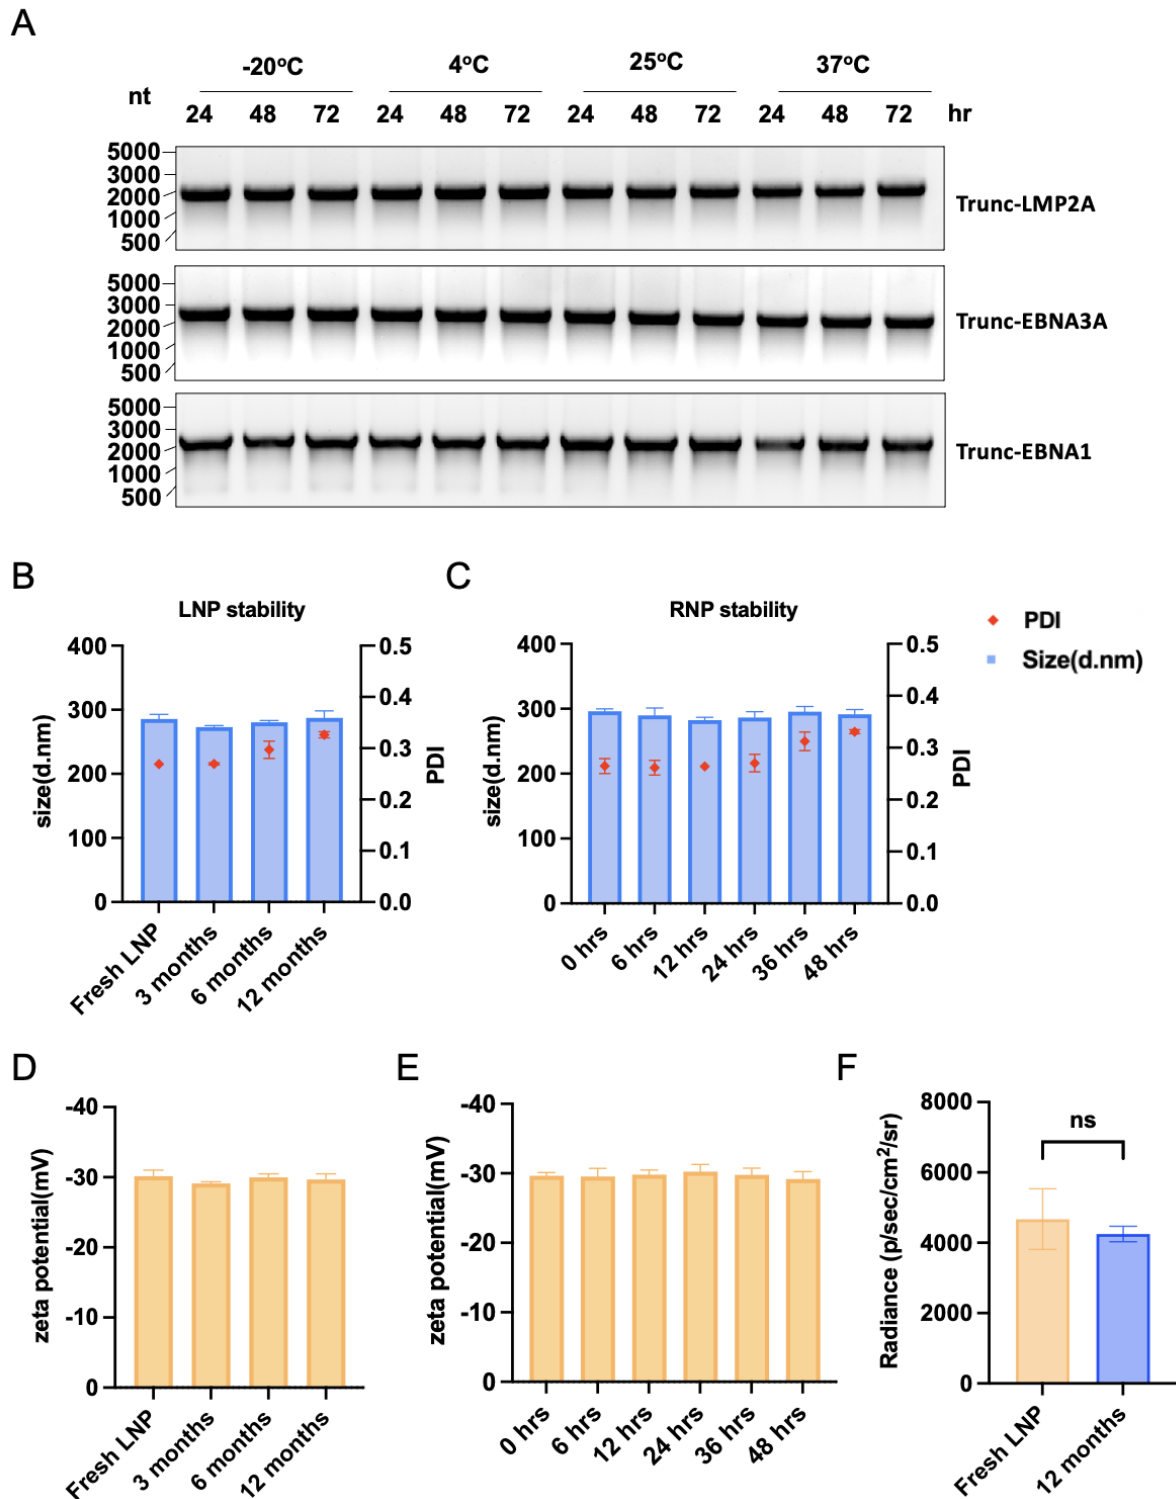

**Fig. S3 Stability assessment of purified mRNA and liposomes.**

(A) The stability of purified mRNA. Purified mRNAs encoding Trunc-LMP2A, Trunc-EBNA3A, or Trunc-EBNA1 with 5' Cap1 and 3' 120-poly(A) tail were stored at different temperatures for up to 3 days. mRNA was denatured in 2× RNA Loading Dye (NEB) and electrophoresed under native 1× Tris-acetate EDTA (TAE) gel conditions. (B) and (D) The particle size (B, blue bars), polydispersity index (PDI) (B, red dots) and zeta potential (D) of

RNP formed using freshly made liposomes or liposomes stored for 3, 6, or 12 months at 4 °C (n=3). (C) and (E) The particle size (C, blue bars), PDI (C, red dots), and zeta potential (E) of RNP were measured during storage from 0 to 48 h at 4 °C (n=3). (F) Six hours after intravenous injection of mRNA encoding luciferase complexed with either freshly made liposomes or liposomes stored for 12 months (n=3), luciferase signals were detected in C57BL/6 mice. Statistical significance was determined using a two-tailed unpaired T-test (F). Error bars, mean  $\pm$  SEM.

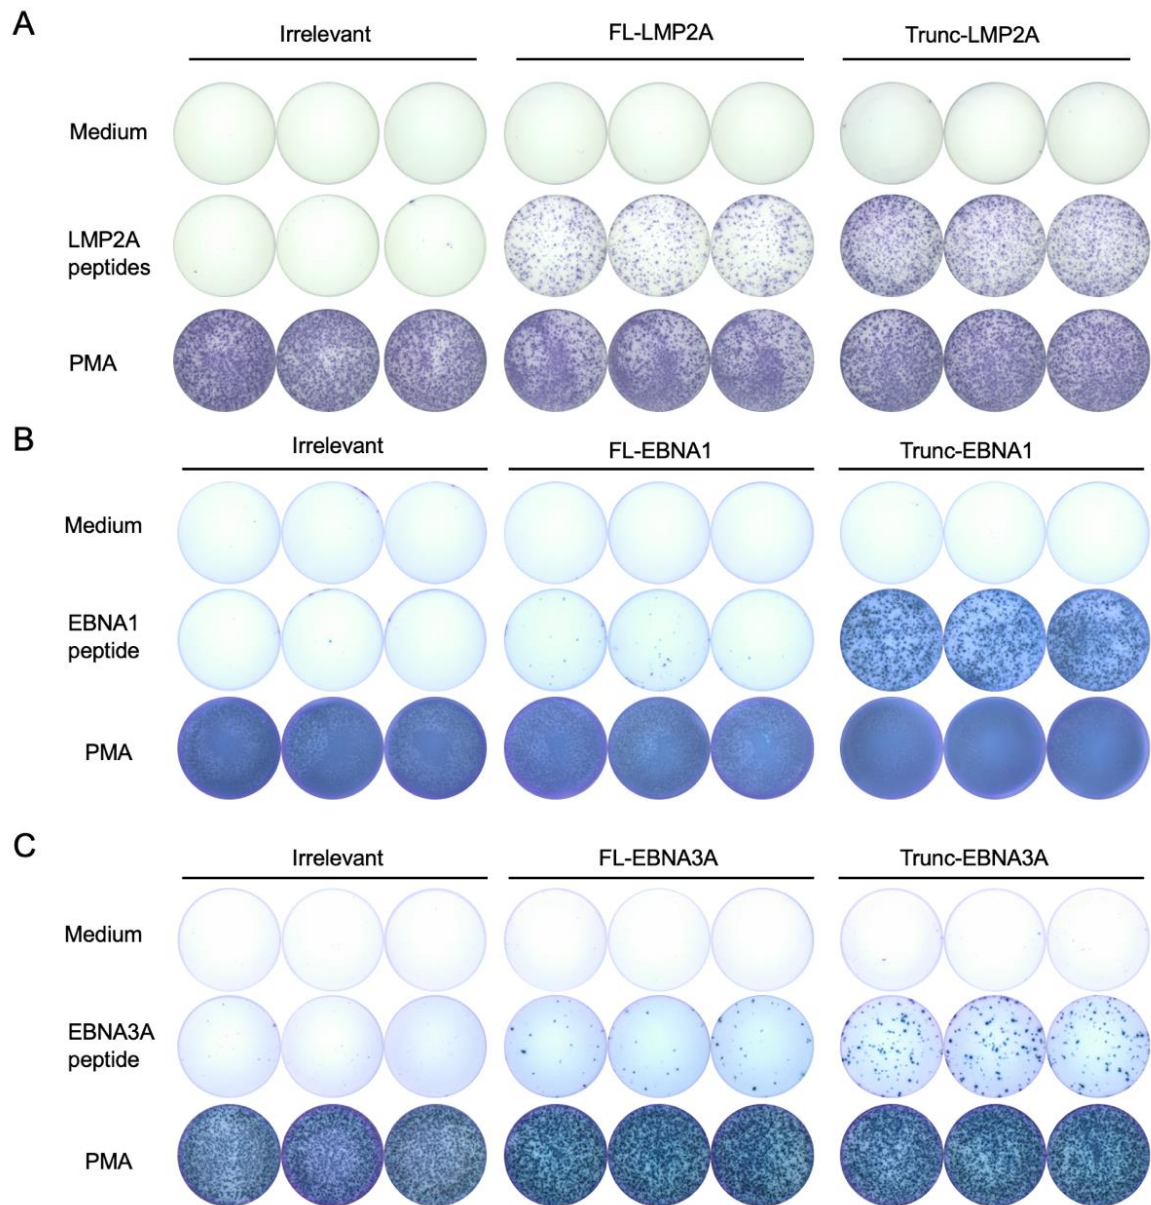

**Fig. S4. RNP-elicited T cell immune responses assessed by ELISPOT.**

(A-C) Representative figures of IFN- $\gamma$  releasing LMP2A-specific cells (A), EBNA1-specific cells (B), and EBNA3A-specific cells (C) corresponding to the ELISPOT assay are shown in Figure 2.

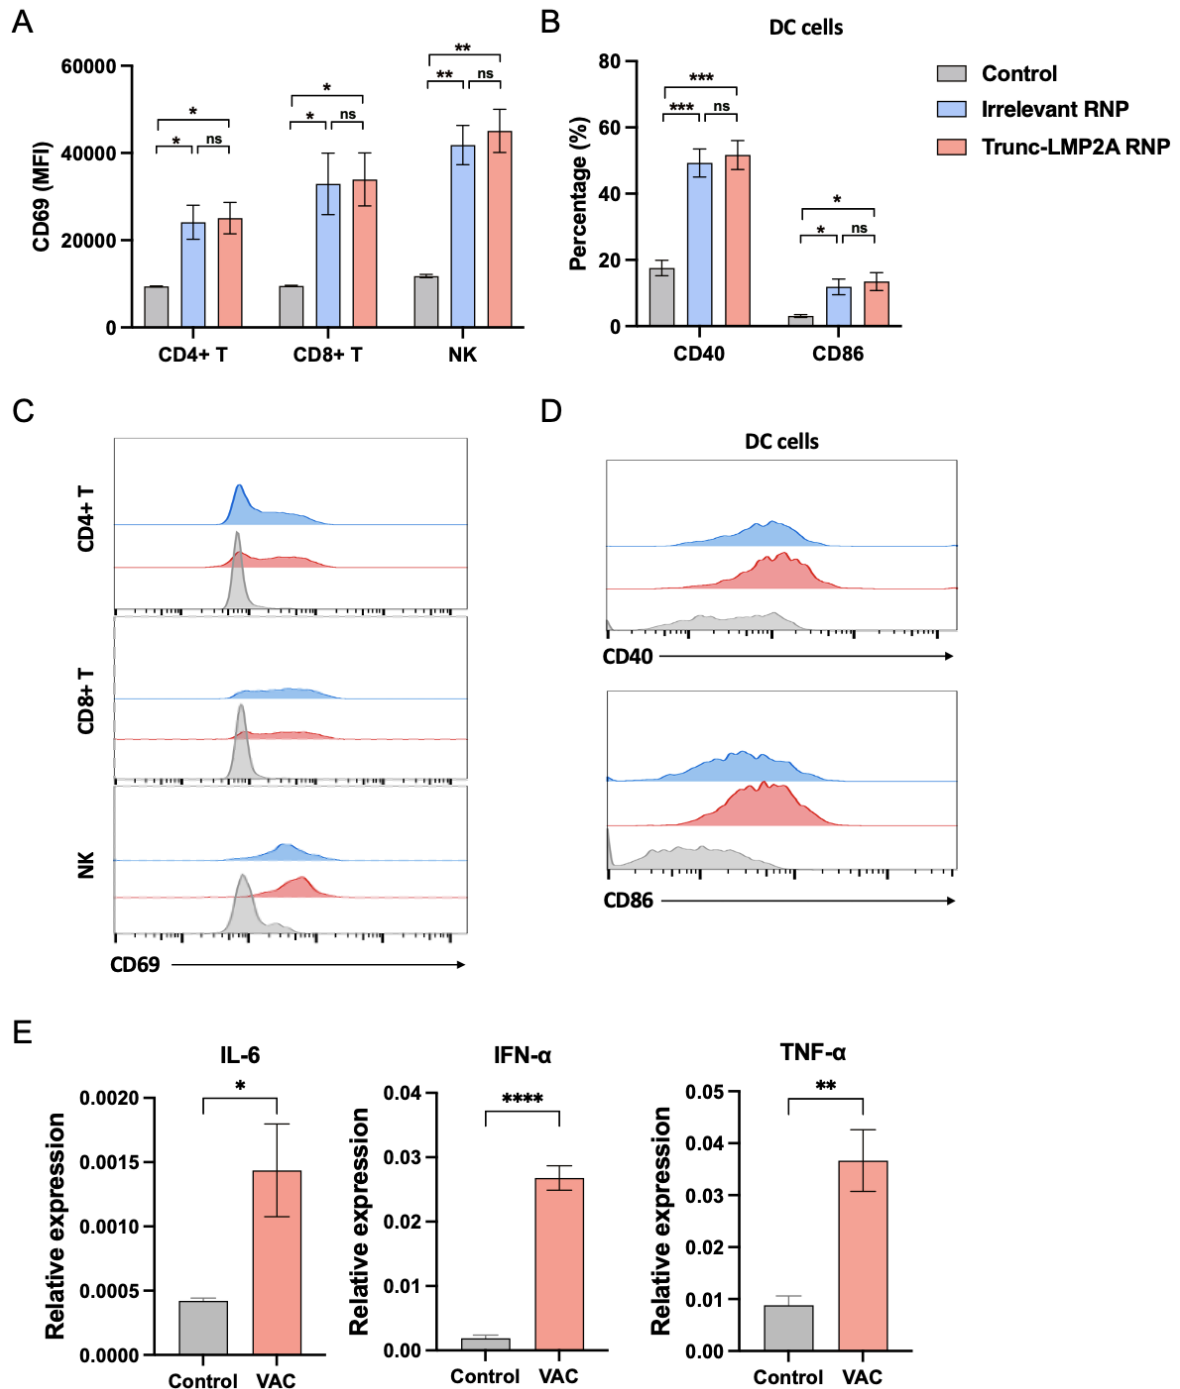

**Fig.S5 Immune activation and cytokine response induced by intravenous injection of RNPs in mice.**

(A) and (C) Activation markers of CD4+ T cells, CD8+ T cells, and natural killer (NK) cells were measured 24 hours after intravenous injection of 40  $\mu$ g of irrelevant RNP, Trunc-LMP2A RNP, or PBS as a control in splenic immune cell subsets of C57BL/6 mice (n = 3). (B) and (D) Maturation marker of dendritic cells measured 24 h after i.v. injection of 40  $\mu$ g irrelevant RNP, Trunc-LMP2A RNP, or PBS as a control in C57BL/6 mice (n=4). (E) Relative expression of IL-6, IFN- $\alpha$ , and TNF- $\alpha$  were measured by RT-qPCR in PBMC in the

mice 24 hours after intravenous injection of 40  $\mu$ g of Trunc-LMP2A RNP or PBS as a control (n=6). Significance was determined using one-way ANOVA followed by Tukey's multiple comparisons (**A** and **B**) and two-tailed unpaired T test (**E**). Error bars, mean  $\pm$  SEM. \*P < 0.05; \*\*P < 0.01; \*\*\*P < 0.001; \*\*\*\*P < 0.0001.



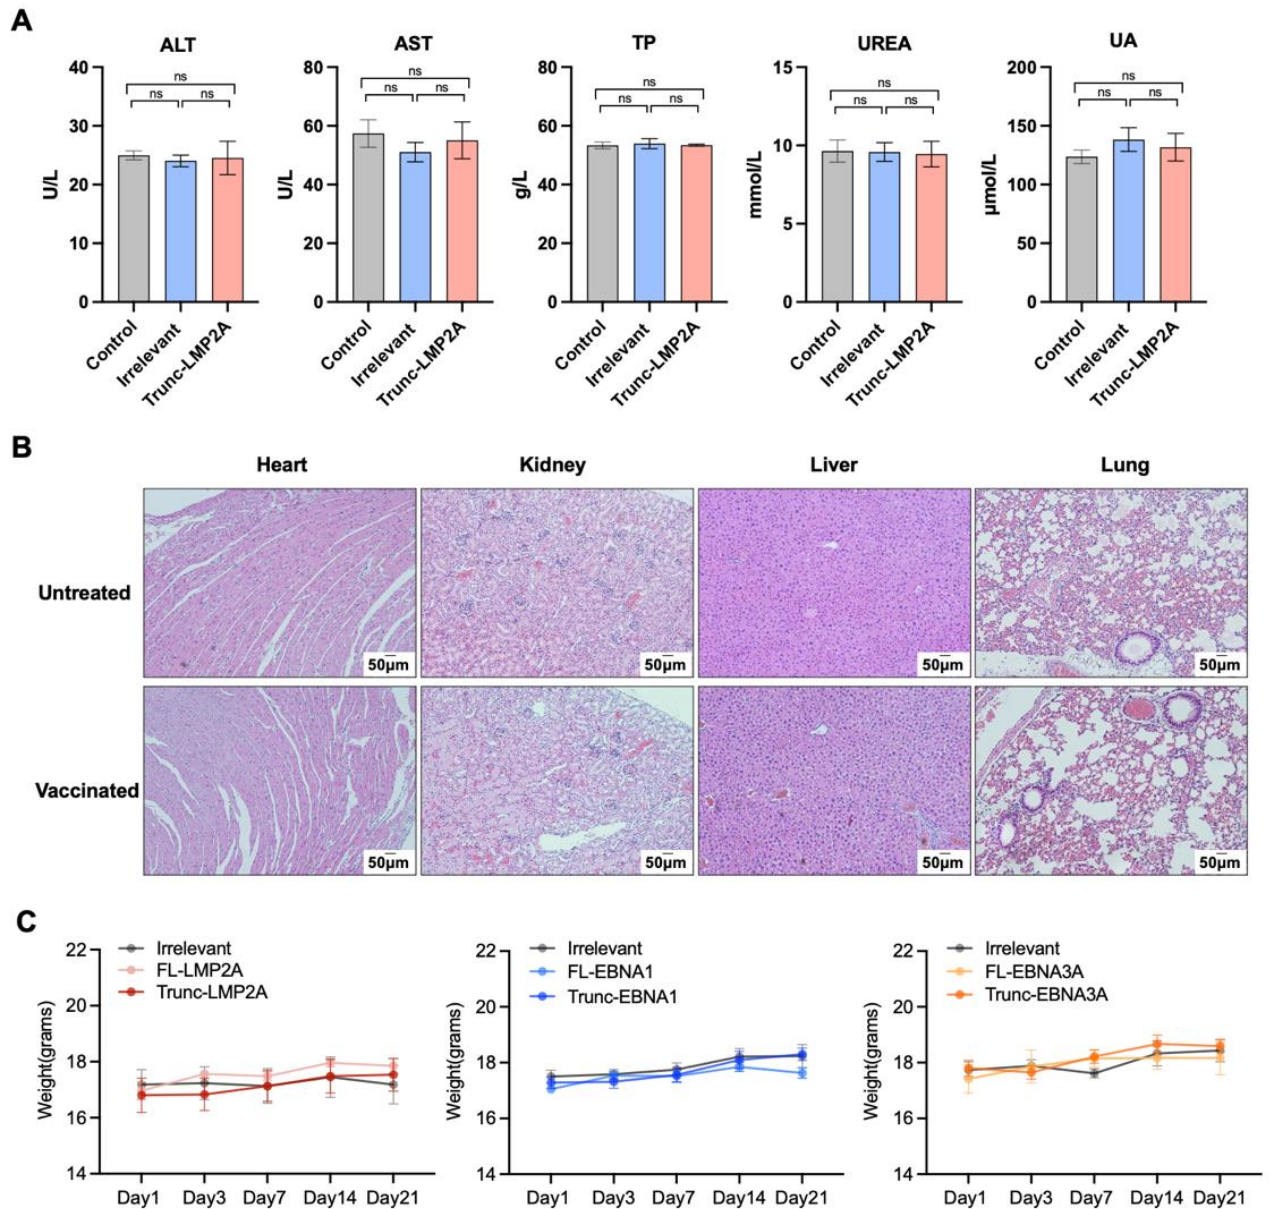

**Fig.S6 No observed RNP vaccination-induced organ toxicity was assessed by biochemical assay and histological analysis.**

(A) Mice were injected with 40  $\mu$ g of irrelevant RNP, Trunc-LMP2A RNP, or PBS as a control, and serum alanine transaminase (ALT), aspartate aminotransferase (AST), total protein (TP), UREA, and uric acid (UA) levels were assessed on day 3 (n=3). (B) Representative pictures from hematoxylin eosin-stained sections of organs harvested from mice on day 21 after immunization and untreated healthy mice of the same age. No significant histological changes have occurred in vaccinated mice. Pictures presented here were from Trunc-LMP2A-RNP vaccinated and untreated healthy mice. Similarly, no significant histological changes were observed in groups treated with other RNPs (data not shown). (C) Body weight changes of mice treated with RNPs (n=6).

Significance was determined using one-way ANOVA followed by Tukey's multiple comparisons (A). Error bars, mean  $\pm$  SEM.

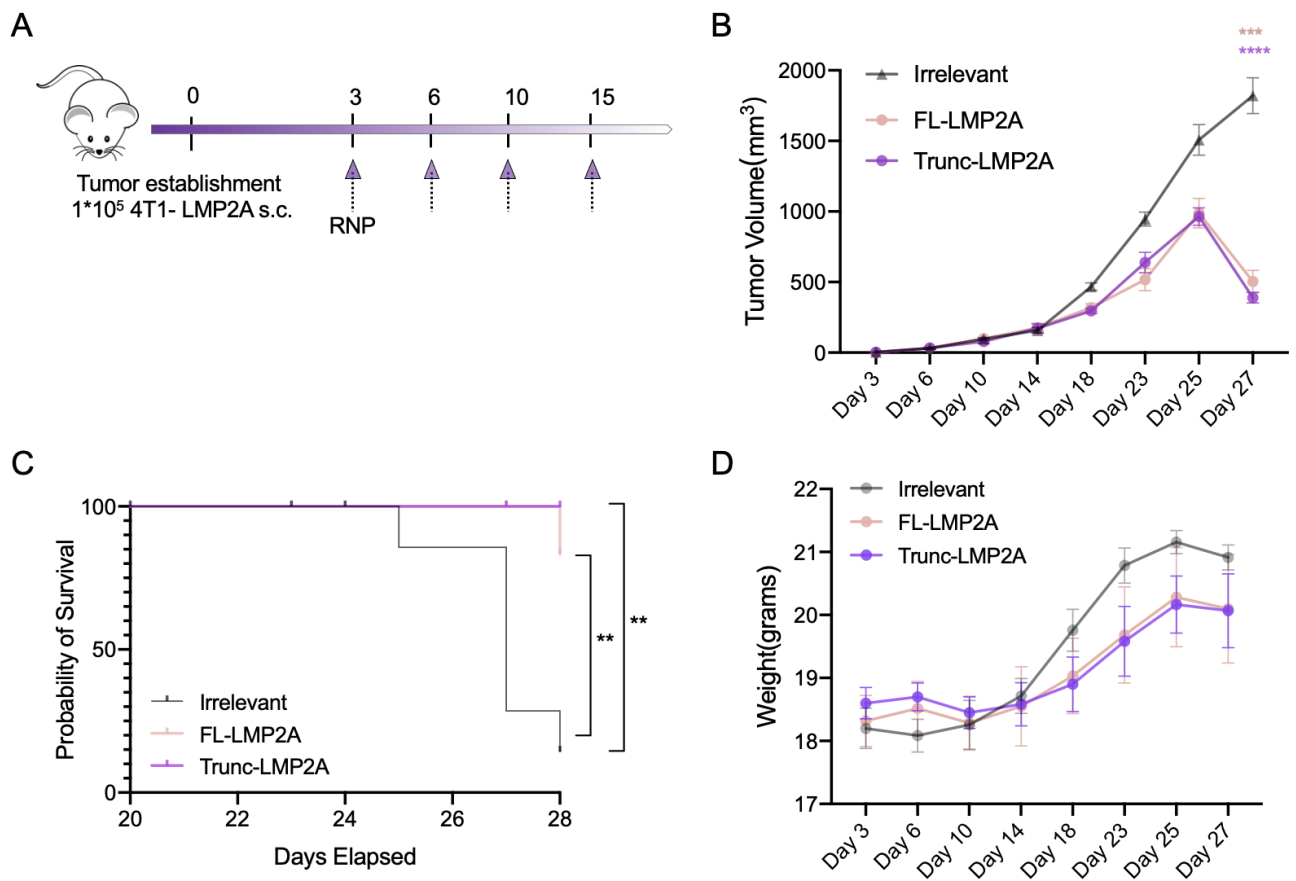

**Fig.S7 Anti-tumor effects of LMP2A RNP vaccination in 4T1-LMP2A tumor-bearing mice.**

(A) BALB/c mice were injected with 4T1-LMP2A cells ( $1 \times 10^5$  per mouse). Mice were divided into three groups randomly and immunized i.v. with 40  $\mu$ g FL-LMP2A-RNP (n=6), Trunc-LMP2A-RNP (n=6), or irrelevant RNP (n=7) on days 3, 6, 10, and 15. (B) Tumor volumes were measured by blinded observers. The greatest longitudinal diameter (length) and the greatest transverse diameter (width) were determined, and tumor volume was calculated using the modified ellipsoidal formula:  $V = \frac{1}{2} (\text{Length} \times \text{Width}^2)$ . (C) Survival curves of 4T1-LMP2A-bearing mice treated with FL-LMP2A-RNP, Trunc-LMP2A-RNP, or irrelevant RNP. Mice were euthanized when the tumor volumes exceeded 2,000 mm<sup>3</sup> or when they reached other humane endpoints, as described in the methods. (D) Body weight changes of tumor-bearing mice. Significance was determined using two-way ANOVA followed by Dunnett's multiple comparisons test (C) and log-rank test (D). Error bars, mean  $\pm$  SEM. \*P < 0.05; \*\*P < 0.01; \*\*\*P < 0.001; \*\*\*\*P < 0.0001.

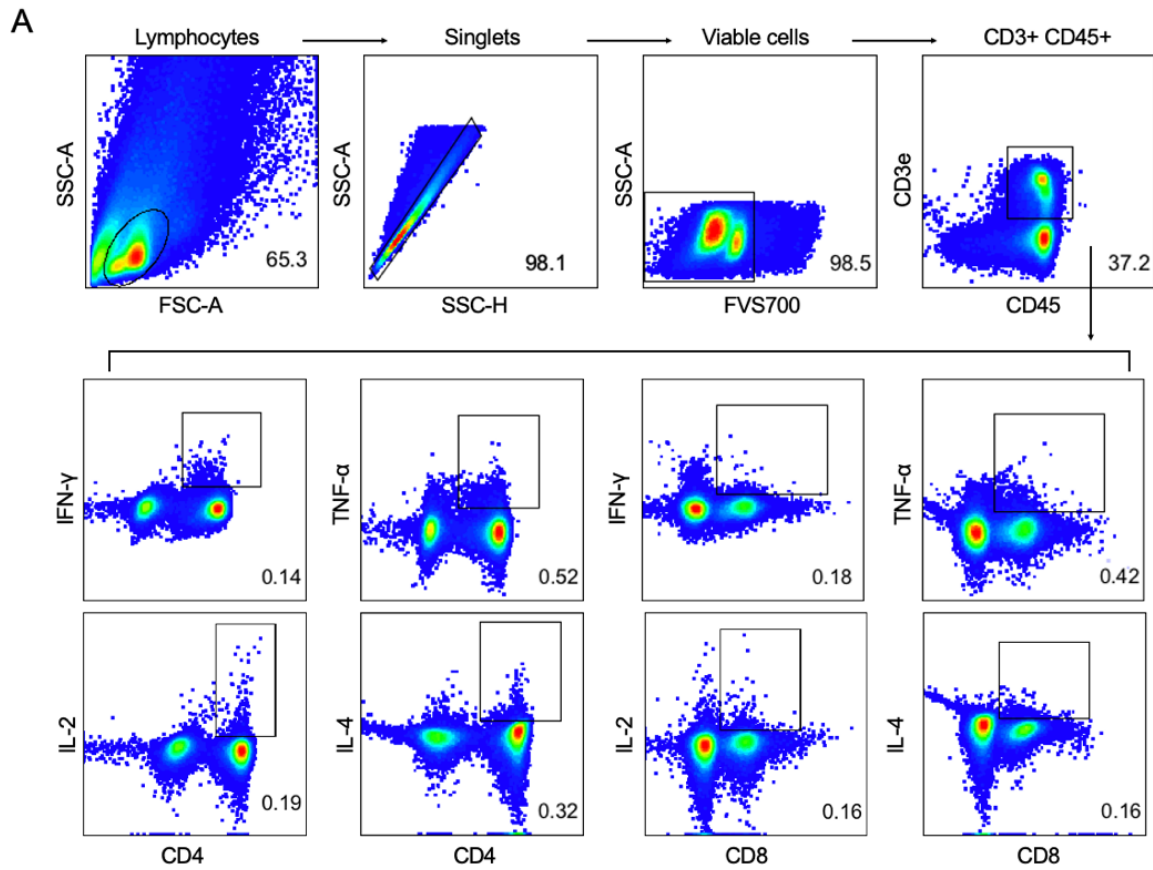

**Fig.S8 Gating Strategy for Intracellular Cytokine Staining Analysis of T Cells**

(A) Gating strategy for analyzing T cells in intracellular cytokine staining panel. Percentages indicate the percent of the parent population.

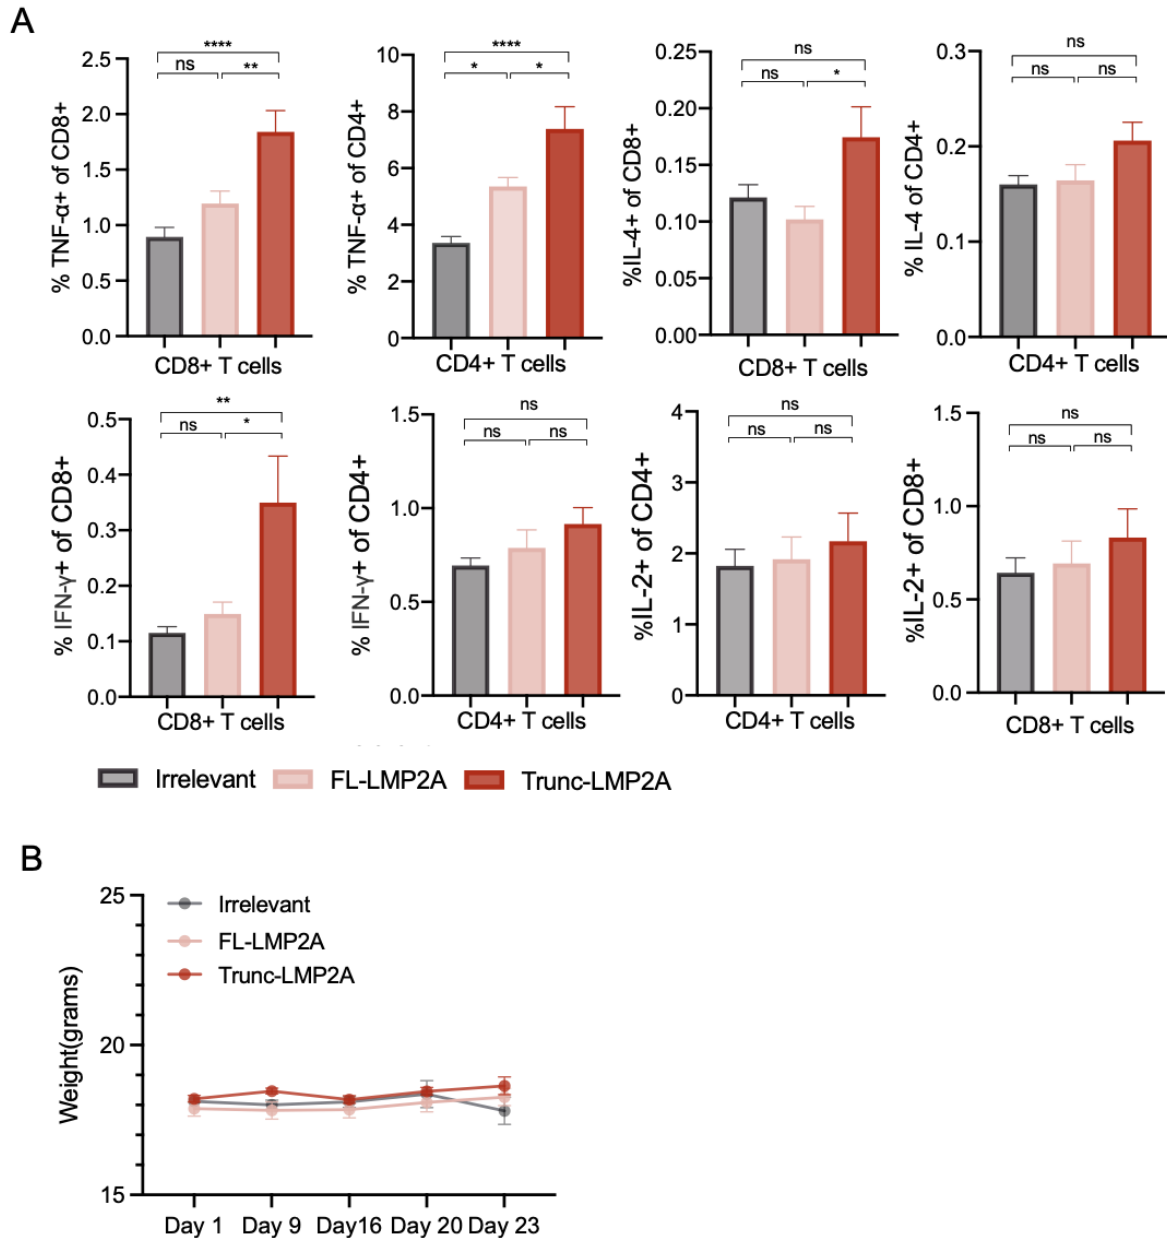

**Fig.S9 Cytokine production and body weight of mice vaccinated with LMP2A RNP.**

(A) Cytokine production induced by Trunc-LMP2A-RNP, FL-LMP2A-RNP, or irrelevant RNP in mice (n=16) was assessed using flow cytometry. Splenocytes harvested from vaccinated mice were stimulated with LMP2A peptides overnight, followed by 6-h incubation with brefeldin A (BFA) (10  $\mu$ g/ml). (B) Body weight changes of tumor-bearing mice treated with Trunc-LMP2A-RNP (n=12), FL-LMP2A-RNP (n=12), or irrelevant RNP (n=14) (related to Figure 3). Significance was determined using one-way ANOVA and Tukey's multiple comparisons (A). Error bars, mean  $\pm$  SEM. \*P < 0.05; \*\*P < 0.01; \*\*\*P < 0.001; \*\*\*\*P < 0.0001.

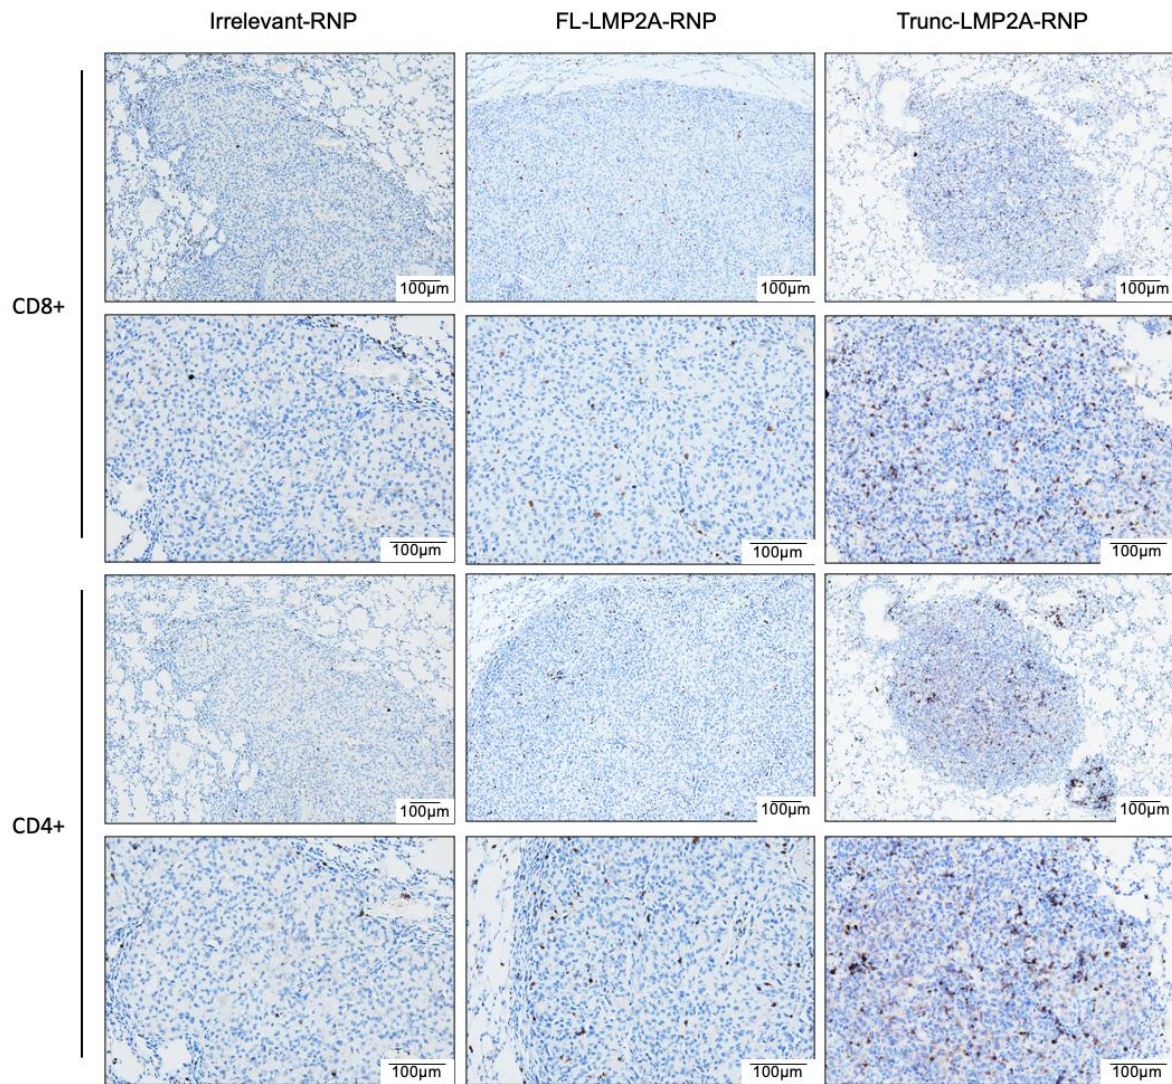

**Fig.S10 Detection of CD4<sup>+</sup> and CD8<sup>+</sup> T-cell infiltration in tumor biopsies from mice immunized with LMP2A RNP.**

Immunohistochemistry was used to quantify CD4<sup>+</sup> and CD8<sup>+</sup> T-cell infiltration in tumor biopsies from mice vaccinated with FL-LMP2A-RNP and Trunc-LMP2A-RNP, or irrelevant-RNP on day 28 post-tumor inoculation. Compared with the controls, T cell infiltration was increased in mice immunized with FL-LMP2A-RNP and Trunc-LMP2A-RNP. For most samples, Trunc-LMP2A-RNP elicits more T-cell infiltration in mice than FL-LMP2A-RNP.

Representative pictures are shown. Brown regions indicate immunoreactivity. The scale bar is displayed (100 µm).

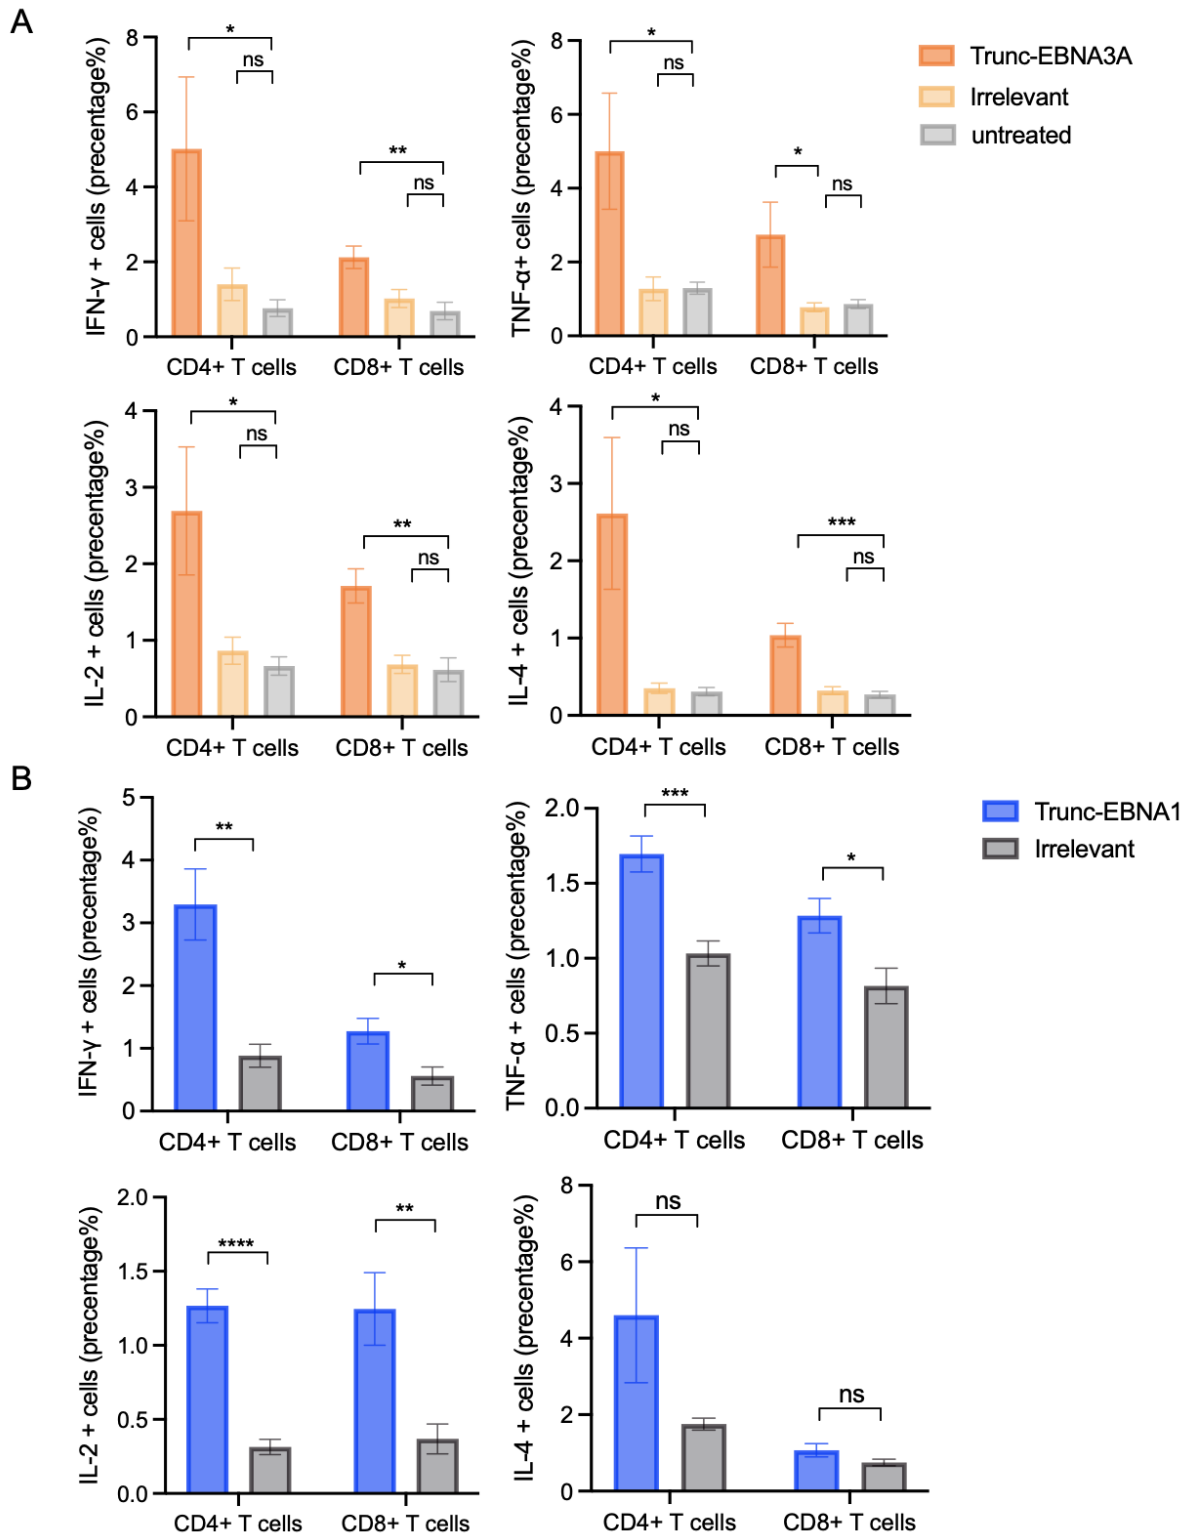

**Fig.S11 Cytokine production induced by Trunc-EBNA3A-RNP and Trunc-EBNA1-RNP in tumor-bearing mice upon peptide stimulation.**

(A) Splenocytes harvested from mice vaccinated with Trunc-EBNA3A-RNP, irrelevant RNP, or untreated were incubated with EBNA3A peptides overnight for flow cytometry analysis (n=6). (B) Splenocytes harvested from mice vaccinated with Trunc-EBNA1-RNP or irrelevant

RNP were incubated with EBNA1 peptides overnight for flow cytometry analysis (n=7). BFA (10  $\mu$ g/mL) was added for the final 6 h of the stimulation. The percentage of cytokine-producing cells was determined using flow cytometry. The frequency of cytokine-producing cells is shown as the mean percentage  $\pm$  SEM of the parent population. Significance was determined using one-way ANOVA and Tukey's multiple comparisons (**A**) and two-tailed unpaired Student's t-test (**B**). \*P < 0.05; \*\*P < 0.01; \*\*\*P < 0.001; \*\*\*\*P < 0.0001.



**Table S1 List of human T-cell epitopes in LMP2A, EBNA1, and EBNA3A  
(corresponding to Figure 1A)**

| Antigen | Abbreviation | T cell epitopes      | MHC restriction                | Starting Position (aa) | Number of References* | Number of Assays* |
|---------|--------------|----------------------|--------------------------------|------------------------|-----------------------|-------------------|
| LMP2A   | MGS          | MGSLEMVPM            | HLA-B*35:01                    | 1                      | 2                     | 2                 |
| LMP2A   | PYL          | PYLFWLAAI            | HLA-A*2402                     | 131                    | 10                    | 27                |
| LMP2A   | FTA          | FTASVSTVV            | HLA-A*68                       | 144                    | 2                     | 2                 |
| LMP2A   | IED          | IEDPPFNSL            | HLA-B*40:01                    | 200                    | 13                    | 19                |
| LMP2A   | ITV          | IYVLVMLVL            | HLA-A*24:02                    | 222                    | 4                     | 14                |
| LMP2A   | RRR          | RRRWRRRLTV           | HLA-B*14:02                    | 236                    | 19                    | 54                |
| LMP2A   | TVC          | TVCGGIMFL            | HLA-A*02:01                    | 243                    | 3                     | 5                 |
| LMP2A   | LIV          | LIVDAVLQL            | HLA-A*02                       | 257                    | 2                     | 3                 |
| LMP2A   | GLG          | GLGTLGAAL            | HLA-A*02:01                    | 293                    | 2                     | 4                 |
| LMP2A   | LLW          | LLWTLVVLL            | HLA-A*02:01                    | 329                    | 18                    | 32                |
| LMP2A   | SSC          | SSCSSCPLSK           | HLA-A*11:01                    | 340                    | 9                     | 36                |
| LMP2A   | CPL          | CPLSKILL             | HLA-B*08                       | 345                    | 2                     | 7                 |
| LMP2A   | ILL          | ILLARLFY             | HLA-A*0201                     | 351                    | 4                     | 5                 |
| LMP2A   | FLY          | FLYALALL             | HLA-A*0201                     | 356                    | 31                    | 62                |
| LMP2A   | GGG          | GGSILQTNFKSLSTEF     | HLA-DPB1                       | 372                    | 2                     | 16                |
| LMP2A   | TYG          | TYGPVFMCL            | HLA-A*24:02                    | 419                    | 22                    | 33                |
| LMP2A   | CLG          | CLGGLLTMV            | HLA-A*02:01                    | 426                    | 99                    | 230               |
| LMP2A   | LLS          | LLSAWILTA            | HLA-A*02:03                    | 447                    | 2                     | 3                 |
| LMP2A   | LTA          | LTAGFLIFL            | HLA-A*02:06                    | 453                    | 5                     | 8                 |
| EBNA1   | RPQ          | RPQKRPSCI            | HLA-B*35:01                    | 72                     | 3                     | 5                 |
| EBNA1   | HPV          | HPVGEADYFEY          | HLA-B*35:01                    | 411                    | 37                    | 124               |
| EBNA1   | VPP          | VPPGAIEQGPTDDPGEGPST | HLA-DR1,<br>DR3, DQ2,<br>DQ5   | 433                    | 2                     | 2                 |
| EBNA1   | DGG          | DGGRRKGGWFGKHR       | n.d.                           | 459                    | 2                     | 4                 |
| EBNA1   | NKP          | NPKFENIAEGLRALL      | HLA-DR11                       | 479                    | 4                     | 8                 |
| EBNA1   | AEG          | AEGLRALLARSHVER      | HLA-DQ7                        | 486                    | 2                     | 4                 |
| EBNA1   | LRA          | LRALLARSHVERTTD      | HLA-DQ3,<br>DQ7, DQB1          | 489                    | 2                     | 2                 |
| EBNA1   | FVY          | FVYGGSKTSL           | HLA-C*03:04                    | 512                    | 3                     | 4                 |
| EBNA1   | VYG          | VYGGSKTSLYNLRRGTALAI | HLA-DR11,<br>DR13, DQ3,<br>DQ6 | 513                    | 3                     | 4                 |
| EBNA1   | YNL          | YNLRRGTAL            | HLA-B*0801                     | 522                    | 3                     | 6                 |
| EBNA1   | IPQ          | IPQCRLTPL            | HLA-B*0702                     | 532                    | 6                     | 8                 |

|        |     |                      |                                           |     |    |     |
|--------|-----|----------------------|-------------------------------------------|-----|----|-----|
| EBNA1  | APG | APGPGPQPGLRESIVCYFM  | HLA-DR1,<br>DR3, DQ2,<br>DQ5              | 548 | 2  | 2   |
| EBNA1  | FMV | FMVFLQTHI            | HLA-A*0201                                | 566 | 4  | 8   |
| EBNA1  | LQT | LQTHIFAEV            | HLA-A*02:06                               | 570 | 2  | 4   |
| EBNA1  | VLK | VLKDAIKDL            | HLA-A*0201                                | 578 | 4  | 4   |
| EBNA1  | PTC | PTCNIKATVCSFDDGVDLPP | HLA-DR2                                   | 593 | 2  | 3   |
| EBNA3A | QAK | QAKWRLQTL            | HLA-A*02:01<br>HLA-B*08:01                | 158 | 27 | 40  |
| EBNA3A | AYS | AYSSWMYSY            | HLA-A*24:02<br>HLA-A*29:02<br>HLA-C*07:02 | 176 | 5  | 5   |
| EBNA3A | RYS | RYSIFFDYM            | HLA-A*24:02                               | 246 | 5  | 16  |
| EBNA3A | AWN | AWNAGFLRGRAYGID      | HLA-B*08                                  | 320 | 1  | 3   |
| EBNA3A | FLR | FLRGRAYGL            | HLA-B*08                                  | 325 | 89 | 259 |
| EBNA3A | EDL | EDLPCIVSRGGPKVKRPPIF | HLA-DR15                                  | 364 | 2  | 4   |
| EBNA3A | RPP | RPPIFIRRL            | HLA-B*07                                  | 379 | 52 | 122 |
| EBNA3A | LEK | LEKARGSTY            | HLA-B*15                                  | 406 | 6  | 8   |
| EBNA3A | HLA | HLAAQGMAY            | HLA-B*46:01                               | 450 | 4  | 6   |
| EBNA3A | YPL | YPLHEQHGM            | HLA-B*35                                  | 458 | 35 | 64  |
| EBNA3A | VPA | VPAPAGPIV            | HLA-B*07                                  | 502 | 6  | 8   |
| EBNA3A | SVR | SVRDLRLARL           | HLA-A*02                                  | 596 | 15 | 31  |
| EBNA3A | RLR | RLRAEAQVK            | HLA-A*03:01                               | 603 | 20 | 28  |
| EBNA3A | GPW | GPWVPEQWMFQGAPPSQGTD | HLA-DR1                                   | 780 | 2  | 5   |

\* Epitope data were collected from Immune Epitope Database (IEDB) and updated in July 2023.

**Table S2 List of murine T-cell epitopes in LMP2A and EBNA1.**

| Antigen | Included in Trunc-EBNA1 or Trunc-LMP2A? | T cell epitopes  | MHC restriction | Starting Position (aa) | Number of References* | Number of Assays* |
|---------|-----------------------------------------|------------------|-----------------|------------------------|-----------------------|-------------------|
| EBNA1   | Yes                                     | VYGGSKTSL        | H2-kd           | 512                    | 1                     | 2                 |
| EBNA1   | Yes                                     | EADYFEYHQEGGPDGE | H2-kd           | 415                    | 1                     | 2                 |
| LMP2A   | Yes                                     | AAALALLASLIL     | H2-Kd           | 305                    | 1                     | 2                 |
| LMP2A   | Yes                                     | TYGPVFMCL        | H2-Kd           | 419                    | 2                     | 2                 |

\* Epitope data were collected from Immune Epitope Database (IEDB) and updated in July 2023.

**Table S3 The sequence of 5'-UTR and 3'-UTR**

|        |                                                                                                                                                                                                                                                                                                                   |
|--------|-------------------------------------------------------------------------------------------------------------------------------------------------------------------------------------------------------------------------------------------------------------------------------------------------------------------|
| 5'-UTR | GGGAAATAAGAGAGAAAAGAAGAGTAAGAAGAAATATAAGAGCCACC                                                                                                                                                                                                                                                                   |
| 3'-UTR | ACGCGTCTGGTACTGCATGCACGCAATGCTAGCTGCCCCTTCCCGT<br>CCTGGGTACCCCGAGTCTCCCCGACCTCGGGTCCCAGGTATGCTC<br>CCACCTCCACCTGCCCCACTCACCACTCTGCTAGTTCCAGACACCT<br>CCCAAGCACGCAGCAATGCAGCTCAAACGCTTAGCCTAGCCACAC<br>CCCCACGGGAAACAGCAGTGATTAACCTTTAGCAATAAACGAAAGTT<br>TAACTAAGCTATACTAACCCCAGGGTTGGTCAATTTTCGTGCCAGCCA<br>CACC |
